# Supplementary material for: Tailoring the electronic structure of In2O3/C photocatalysts for enhanced CO2reduction
Source: Royal Society of Chemistry journal article supplement (doi:10.1039/d2ta09236k), 2023-01-01
Supplement: d2ta09236k1.pdf [file d2ta09236k1.pdf]

## Supporting Information

### **Tailoring the electronic structure of In<sub>2</sub>O<sub>3</sub>/C photocatalysts for enhanced CO<sub>2</sub> reduction**

Awu Zhou,<sup>a, b</sup> Chen Zhao,<sup>b</sup> Jianchi Zhou,<sup>a</sup> Yibo Dou,<sup>\*a</sup> Jian-Rong Li<sup>b</sup> and Min Wei<sup>a</sup>

*<sup>a</sup>State Key Laboratory of Chemical Resource Engineering, Beijing University of  
Chemical Technology, Beijing 100029, PR China*

*<sup>b</sup>Beijing Key Laboratory for Green Catalysis and Separation and Department of  
Chemistry and Chemical Engineering, Beijing University of Technology, Beijing  
100124, P. R. China*

E-mail: [douyb@buct.edu.cn](mailto:douyb@buct.edu.cn)

## 1. Supplemental Experimental Procedures:

### 1.1 Preparation of hexagonal M-MIL-68 (In) ( $M = \text{Cu}, \text{Zn}, \text{and Fe}$ )

MIL-68 (In) was synthesized according to a previously reported solvothermal method.<sup>1, 2</sup> As for MIL-68 (In),  $\text{In}(\text{NO}_3)_3$  (0.6 mmol), and terephthalic acid (1.1 mmol) were dissolved in 80 mL *N,N*-dimethylformamide (DMF). After stirring under ultrasonic concussion for 15 minutes, the mixture was placed in an oil bath at 120 °C for 6 hours. Then, the products were collected and washed with deionized water and ethanol and dried under vacuum at 60 °C. Cu-MIL-68 (In) was prepared by a similar procedure of using  $\text{Cu}(\text{NO}_3)_2 \cdot 3\text{H}_2\text{O}$  (0.075 mmol) and  $\text{In}(\text{NO}_3)_3$  (0.525 mmol) as the metal source. In addition, the Fe-MIL-68 (In) and Zn-MIL-68 (In) were prepared by a similar method, in which  $\text{Fe}(\text{NO}_3)_3 \cdot 9\text{H}_2\text{O}$  and  $\text{Zn}(\text{NO}_3)_2 \cdot 6\text{H}_2\text{O}$  were used instead of  $\text{Cu}(\text{NO}_3)_2 \cdot 3\text{H}_2\text{O}$ , respectively.

### 1.2 Preparation of hexagonal M-In<sub>2</sub>O<sub>3</sub>/C (In) ( $M = \text{Cu}, \text{Zn}, \text{and Fe}$ ) nanotube

The photocatalysts ( $\text{In}_2\text{O}_3/\text{C}$ , Cu- $\text{In}_2\text{O}_3/\text{C}$ , Zn- $\text{In}_2\text{O}_3/\text{C}$ , and Fe- $\text{In}_2\text{O}_3/\text{C}$ ) were derived from MIL-68 (In), Cu-MIL-68 (In), Zn-MIL-68 (In), and Fe-MIL-68 (In) by pyrolysis treatment, respectively. Typically, M- $\text{In}_2\text{O}_3/\text{C}$  was synthesized *via* calcination of the obtained M-MIL-68 (In) at 500 °C for 45 min under  $\text{N}_2$  with 5 °C min<sup>-1</sup>.

### 1.3 Preparation of hexagonal M-In<sub>2</sub>O<sub>3</sub> (In) ( $M = \text{Cu}, \text{Zn}, \text{and Fe}$ ) nanotube

The photocatalysts ( $\text{In}_2\text{O}_3$ , Cu- $\text{In}_2\text{O}_3$ , Zn- $\text{In}_2\text{O}_3$ , and Fe- $\text{In}_2\text{O}_3$ ) were synthesized *via* calcination of obtained MIL-68 (In), Cu-MIL-68 (In), Zn-MIL-68 (In), and Fe-MIL-68 (In), respectively. Typically, M- $\text{In}_2\text{O}_3$  was synthesized *via* calcination of the M-MIL-68 (In) at 500 °C for 6 hours under air with 5 °C min<sup>-1</sup>.

### 1.4 Photoreduction reaction

The photocatalytic  $\text{CO}_2$  reduction reaction was performed in a closed stainless reactor (50 mL in capacity) with a quartz window. Typically, 30 mg photocatalyst and 50  $\mu\text{L}$  triethylamine (TEA) were spread in the reactor. The photoreactor system was firstly washed with  $\text{N}_2$ , and then high purity  $\text{CO}_2$  ( $\geq 99.999\%$ ) bubbled through water

was introduced into the reactor with 0.1 MPa pressure. Under full spectrum irradiation (300 W xenon lamp with an optical density of 2550 mW cm<sup>-2</sup>), the products formed were detected in a fixed time interval. The carbon species were analyzed using a gas chromatograph (GC, Agilent 7890B) equipped with a thermal conductivity detector (TCD) detector and He served as the carrier gas. The produced H<sub>2</sub> and O<sub>2</sub> were analyzed by GC (Shimadzu GC2014C) equipped with a TCD detector using N<sub>2</sub> as carrier gas. The CO and CH<sub>4</sub> selectivity can be obtained by following the formula that

$$\text{CO selectivity (\%)} = \frac{\text{Yield of CO}}{\text{Yield of all products}} \times 100\%$$

$$\text{CH}_4 \text{ selectivity (\%)} = \frac{\text{Yield of CH}_4}{\text{Yield of all products}} \times 100\%.$$

The experiments on apparent quantum efficiency (AQE) of CO were performed under a monochromatic light beam with an excitation wavelength ( $\lambda$ ) of 380 nm. The average intensity (I) of irradiation was determined to be 183 mW cm<sup>-2</sup> by a light meter (PL-MW2000 Photoradiometer, PerfectLight) at room temperature. The irradiation area (S) was controlled to be 14.5 cm<sup>2</sup>. The number of incident photons (N) is calculated

by equations:  $N = \frac{E \lambda}{h c}$ , where  $E$  is the total incident energy on the photocatalyst (J),  $h$  is Planck's constant ( $6.626 \times 10^{-34}$  J s),  $c$  is the speed of light ( $3 \times 10^8$  m s<sup>-1</sup>),  $N_A$  is Avogadro's number ( $6.02 \times 10^{23}$  mol<sup>-1</sup>).

After 2 h, the CO amounts ([CO]) of Cu-In<sub>2</sub>O<sub>3</sub>/C, Zn-In<sub>2</sub>O<sub>3</sub>/C, and Fe-In<sub>2</sub>O<sub>3</sub>/C nanotubes are 0.62  $\mu$ mol, 0.43  $\mu$ mol, 0.31  $\mu$ mol, respectively.

Based on equations:  $\text{AQE (CO)} = \frac{2 \times \text{the number of evolved CO molecules}}{\text{the number of incident photons}} \times 100\%$ , the AQE (CO) of Cu-In<sub>2</sub>O<sub>3</sub>/C, Zn-In<sub>2</sub>O<sub>3</sub>/C and Fe-In<sub>2</sub>O<sub>3</sub>/C at 380 nm is about  $2 \times 10^{-3}\%$ ,  $1 \times 10^{-3}\%$  and  $1 \times 10^{-3}\%$ , respectively.

### 1.5 Photoelectrochemical measurements

The CO<sub>2</sub> photoreduction system is a gas-solid reaction, instead of a solid-liquid

reaction. Therefore, it is difficult to provide similar conditions for PEC or EIS measurements. Alternately, we conducted photoelectrochemical measurements by using 0.5 M Na<sub>2</sub>SO<sub>4</sub> as the electrolyte, which is reported as a general measurement condition in photocatalytic CO<sub>2</sub> reduction.<sup>3,4</sup> Photoelectrochemical (PEC) measurements were performed on a CHI 660E electrochemical work station (Chenhua Instrument, Shanghai, China) in a standard three-electrode system with the photocatalyst-coated Fluorine-Tin-Oxide (FTO) as the working electrode, Pt plate as the counter electrode, and Ag/AgCl as the reference electrode. A 0.5 M Na<sub>2</sub>SO<sub>4</sub> solution was used as the electrolyte. The as-synthesized sample (1 mg) was added into 50  $\mu$ L Nafion and 2.0 mL methanol mixed solution, and the working electrode was prepared by dropping the suspension (100  $\mu$ L) onto the surface of an FTO plate (1 $\times$ 1 cm<sup>2</sup>). The working electrode was dried at room temperature, and the photo-responsive signals of the samples were measured under chopped light at 0.5 V. The electrochemical impedance spectroscopy (EIS) was performed on the Zennium electrochemistry work station in a standard three-electrode system. The EIS measurement was performed with a bias potential of -0.6 V with a frequency range from 10<sup>-2</sup> to 10<sup>5</sup> Hz.

### 1.6 Characterization

Powder X-ray diffraction (PXRD) patterns were recorded on an XRD-6000 (Rigaku Co.) diffractometer with Cu K $\alpha$  ( $\lambda$  = 1.5418 Å) radiation (40 kV, 30 mA), with a scan step of 0.02°. Fourier transform infrared (FT-IR) spectra were obtained on a Vector 22 (Bruker) spectrophotometer with 2 cm<sup>-1</sup> resolution. The *in situ* diffuse reflectance infrared Fourier transform spectroscopy (DRIFTS) measurement was carried out in a quartz cell equipped with KBr windows allowing sample activation and successive measurements. The DRIFTS were recorded with a Nicolet 380 instrument spectrophotometer at a spectral resolution of 4 cm<sup>-1</sup> and an accumulation of 64 scans. Raman spectra were obtained on a Renishaw instrument (in Via-Reflex, 633 nm). UV-vis absorption spectrum was recorded on a Shimadzu UV-2600 spectrophotometer in the wavelength range of 200–800 nm. Solid-state UV-vis diffuse absorption spectra were recorded on a Shimadzu UV-2600 spectrometer equipped with an integrating

sphere attachment at room temperature and a white standard of BaSO<sub>4</sub> was used as a reference. X-ray photoelectron spectroscopy (XPS) was obtained on an ESCALAB 250Xi XPS spectrometer (Thermo Fisher Scientific) using Al K $\alpha$  radiation. CO<sub>2</sub> adsorption/desorption isotherms at 298 K and N<sub>2</sub> adsorption/desorption isotherms were measured on a Micrometitics Surface Area Analyzer (ASAP 2020). Electron spin resonance spectra were recorded on Bruker ELEXSYS CW-EPR electron paramagnetic resonance spectrometer. The morphology of the samples was investigated using a scanning electron microscope (SEM Zeiss SUPRA 55) with an accelerating voltage of 20 kV, combined with energy dispersive X-ray spectroscopy (EDS) for the elemental analysis. Transmission electron microscopic and high-resolution transmission electron microscopic (TEM and HR-TEM) images were recorded on the JEOL JEM-2100 instrument at an accelerating voltage of 200 kV. Elemental mapping images were recorded with an X-ray energy dispersive spectroscopy (EDX) attached to TEM.

### *1.7 The calculation of band gap energy*

Kubelka-Munk function and Tauc equation were utilized to calculate the band gap of the materials.<sup>5, 6</sup> The Kubelka-Munk function  $F(R)$  is as follows:

$$F(R) = \frac{(1 - R)^2}{2R} \quad \text{Equation (S1)}$$

Where  $R$  is the absolute reflectance of the sample.

And Tauc equation is as follows:

$$(\alpha h \nu)^{1/n} = A(h \nu - E_g) \quad \text{Equation (S2)}$$

Where  $\alpha$ ,  $h$ ,  $\nu$ ,  $E_g$  and  $A$  are the absorption coefficient, Planck's constant, frequency of the incident photon, band gap of the materials and constant depending on the properties of the material.

The DRS of the sample is converted to Kubelka-Munk function as  $F(R)$  is proportional to the absorption coefficient. The  $\alpha$  in the Tauc equation is substituted with  $F(R)$ . Hence, the converted equation is as follows:

$$[F(R)h\nu]^{1/n} = A(h\nu - E_g) \quad \text{Equation (S3)}$$

which can correspond to a permitted direct ( $n = 0.5$ ), permitted indirect ( $n = 2$ ), prohibited direct ( $n = 1.5$ ), or prohibited indirect transition ( $n = 3$ ).

The graph on plotting  $[F(R)h\nu]^{1/n}$  versus  $h\nu$ , the tangent line drawn along the slope of the spectra which intersection point with the x-axis gives an estimate of the band gap energy.

## 2. Computation section

### 2.1 Model construction and Computational method

Theoretical exploration was completed with CASTEP module. Plane wave was used to perform the DFT calculation with GGA-PBE level.  $\text{In}_2\text{O}_3$  and  $\text{Cu-In}_2\text{O}_3$  were constructed according to the experimental PXRD pattern (Fig. 2A). The space group of  $\text{In}_2\text{O}_3$  is Cubic  $\text{Ia}\bar{3}$ , with the lattice parameters,  $a = b = c = 10.118 \text{ \AA}$ ,  $\alpha = \beta = \gamma = 90^\circ$ . The supercell of  $\text{In}_2\text{O}_3$  is  $2 \times 2 \times 2$  in the a-, b-, and c- directions, respectively. The structural model and photocatalytic  $\text{CO}_2$  reduction calculation were consistent with our previous work.<sup>7</sup>

### 3. Supplementary Figures and Table

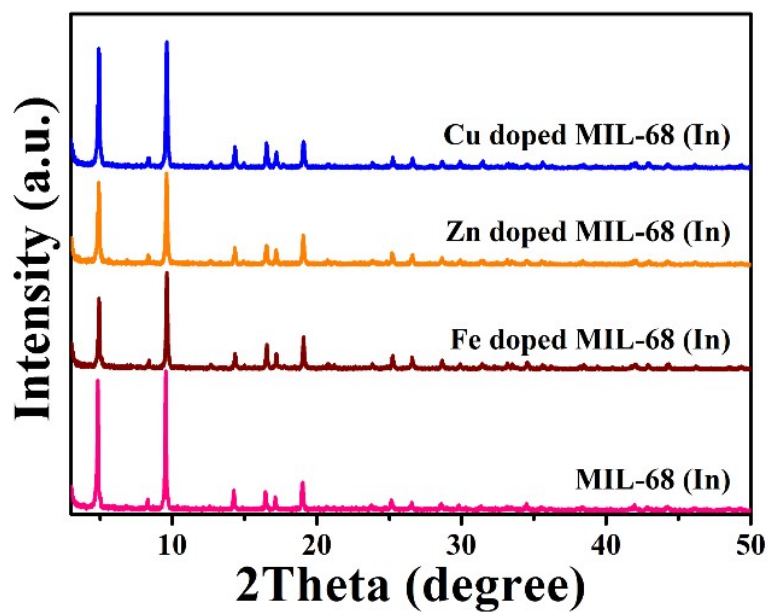

**Fig. S1.** XRD patterns of MIL-68 (In), Cu-MIL-68 (In), Fe-MIL-68 (In), and Zn-MIL-68 (In).

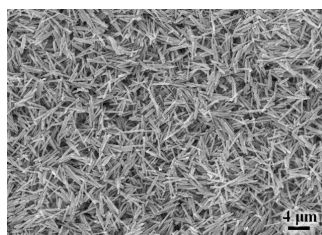

**Fig. S2.** SEM image of Zn-MIL-68 (In).

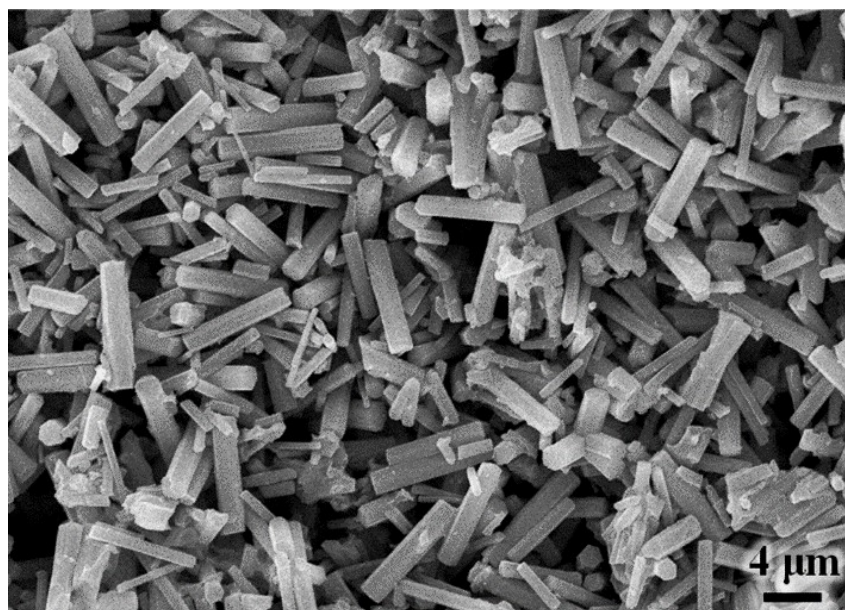

**Fig. S3.** SEM image of Fe-MIL-68 (In).

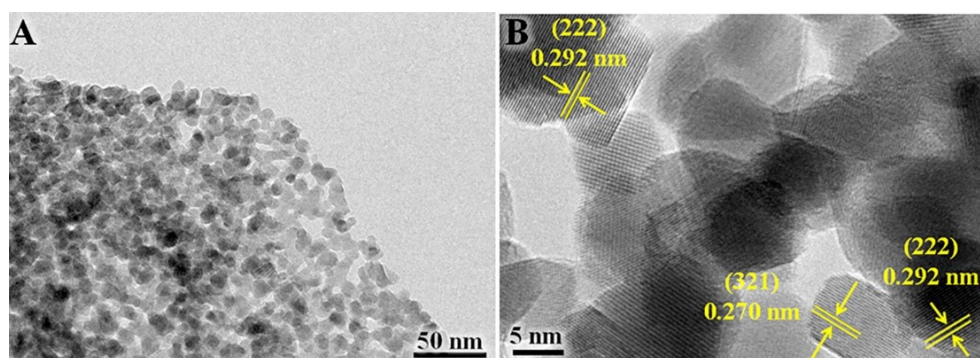

**Fig. S4.** (A) TEM and (B) HR-TEM images of  $\text{In}_2\text{O}_3/\text{C}$ .



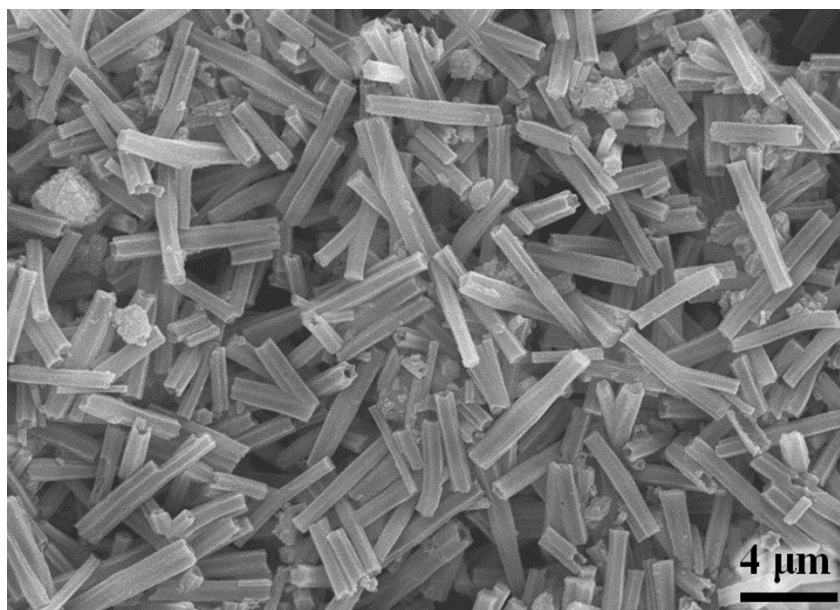

**Fig. S5.** SEM image of Zn-In<sub>2</sub>O<sub>3</sub>/C.

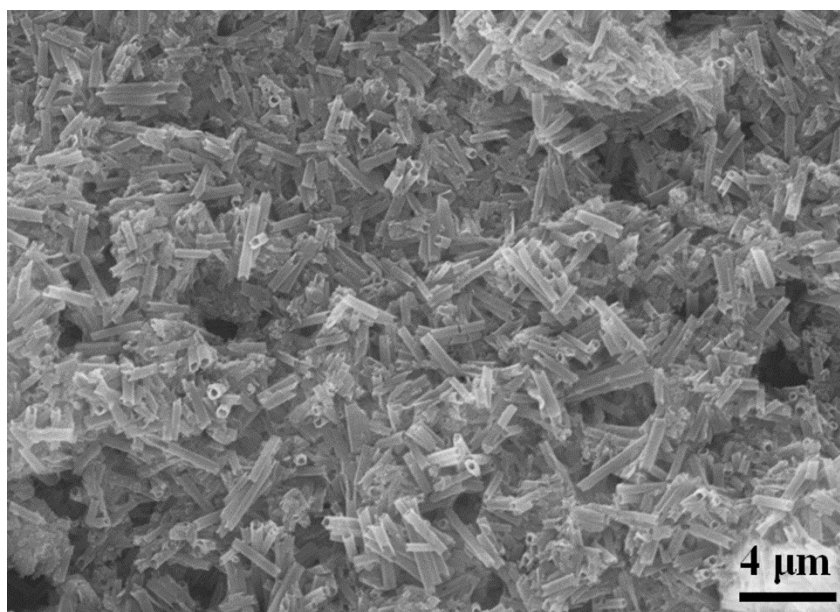

**Fig. S6.** SEM image of Fe-In<sub>2</sub>O<sub>3</sub>/C.

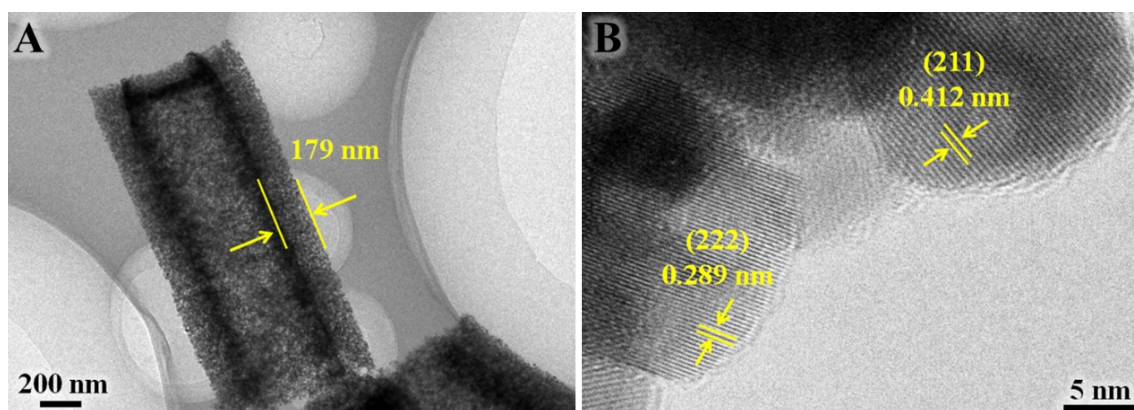

**Fig. S7.** (A) TEM and (B) HR-TEM images of Zn-In<sub>2</sub>O<sub>3</sub>/C.

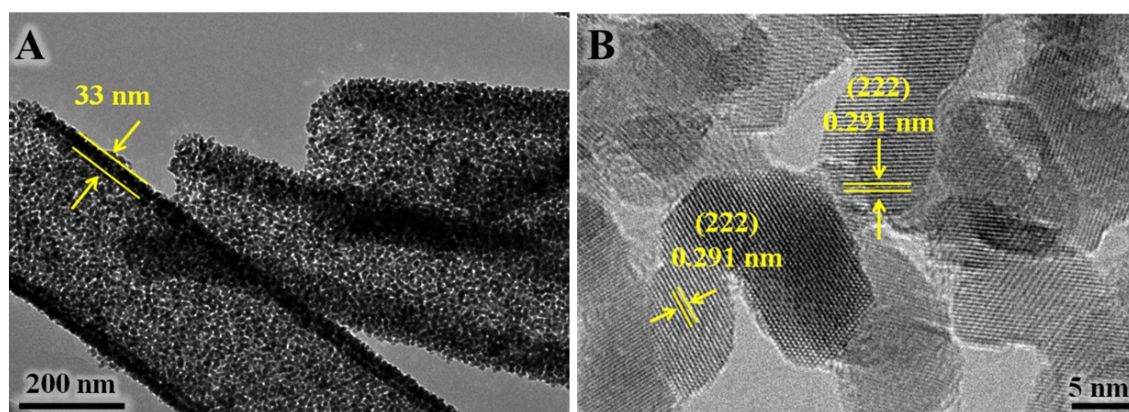

**Fig. S8.** (A) TEM and (B) HR-TEM images of Fe-In<sub>2</sub>O<sub>3</sub>/C.

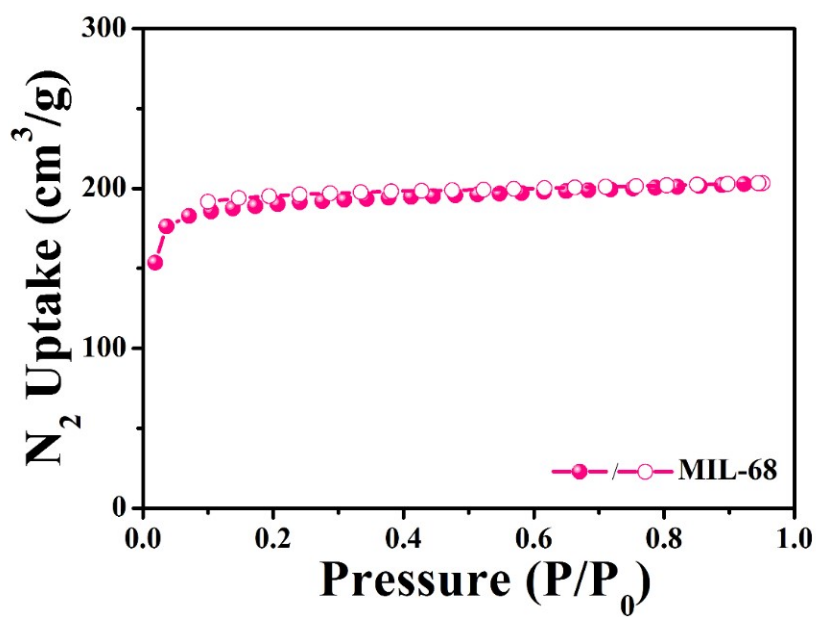

Fig. S9.  $N_2$  adsorption/desorption isotherm of MIL-68 (In).

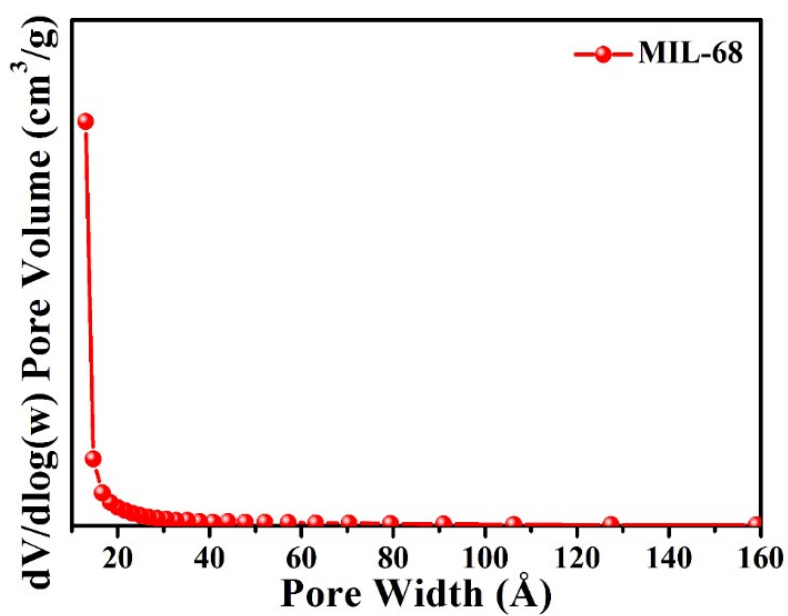

Fig. S10. The pore size distribution of MIL-68 (In).

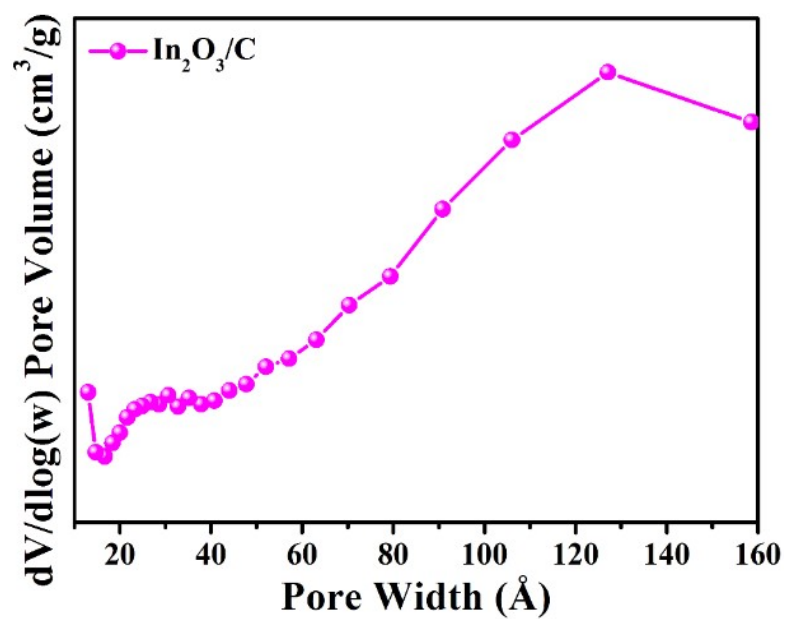

Fig. S11. The pore size distribution of  $\text{In}_2\text{O}_3/\text{C}$ .

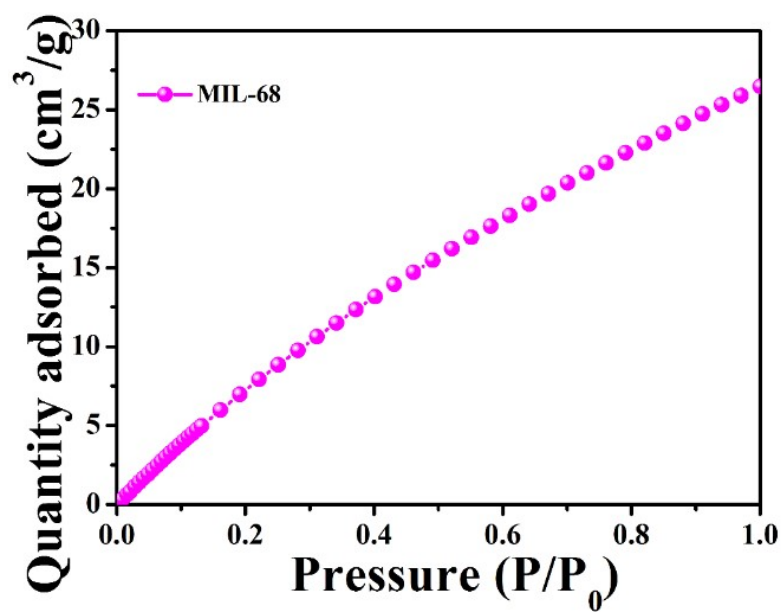

Fig. S12.  $\text{CO}_2$  adsorption isotherms of MIL-68 (In).

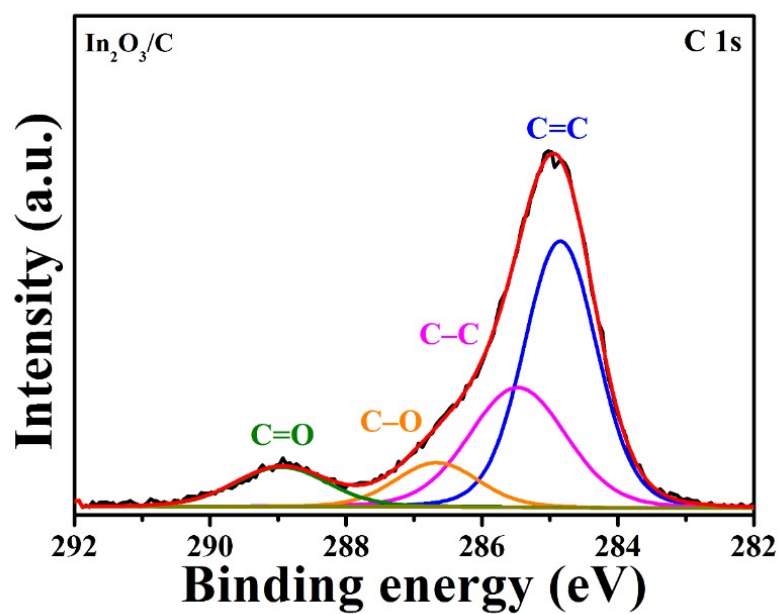

Fig. S13. High-resolution C 1s XPS spectrum for  $\text{In}_2\text{O}_3/\text{C}$ .

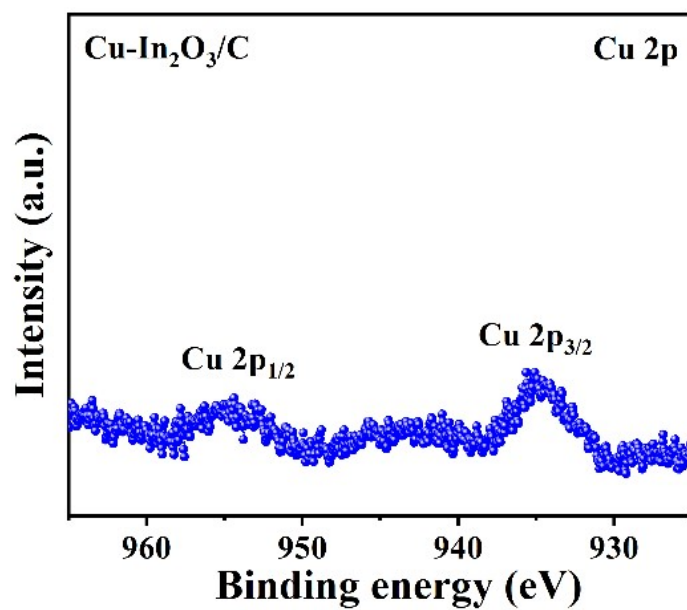

Fig. S14. High-resolution Cu 2p XPS spectra of  $\text{Cu-In}_2\text{O}_3/\text{C}$ .

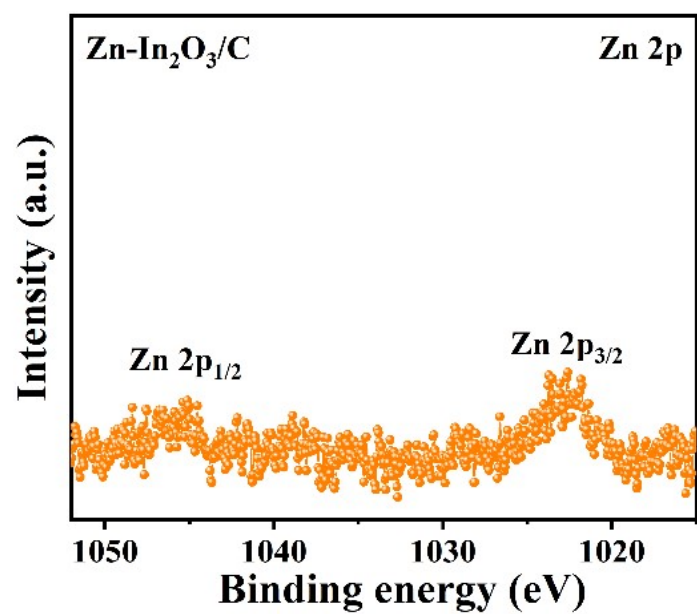

Fig. S15. High-resolution Zn 2p XPS spectra of Zn-In<sub>2</sub>O<sub>3</sub>/C.

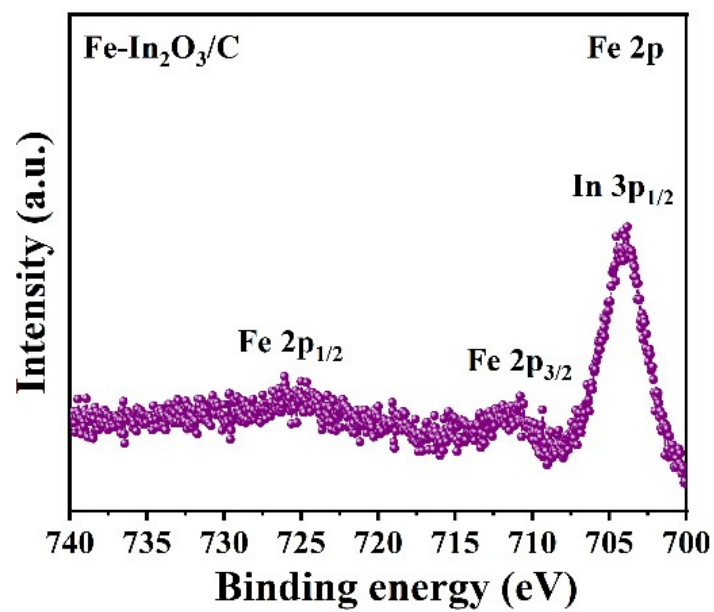

Fig. S16. High-resolution Fe 2p XPS spectra of Fe-In<sub>2</sub>O<sub>3</sub>/C.

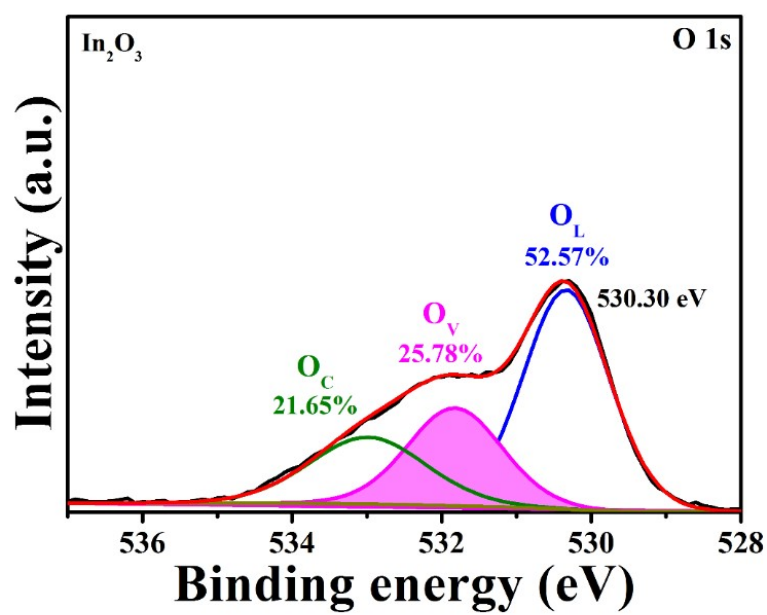

Fig. S17. High-resolution O 1s XPS spectrum for  $\text{In}_2\text{O}_3/\text{C}$ .

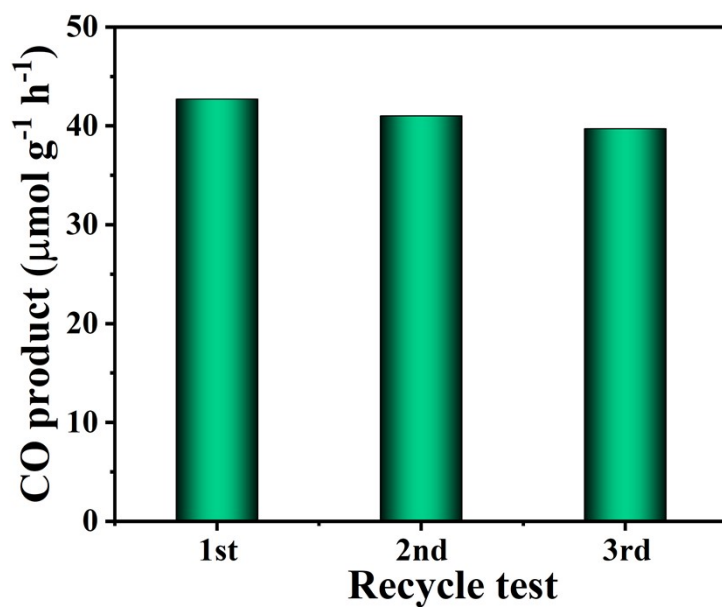

Fig. S18. The recycle experiments of the  $\text{Cu-In}_2\text{O}_3/\text{C}$ .



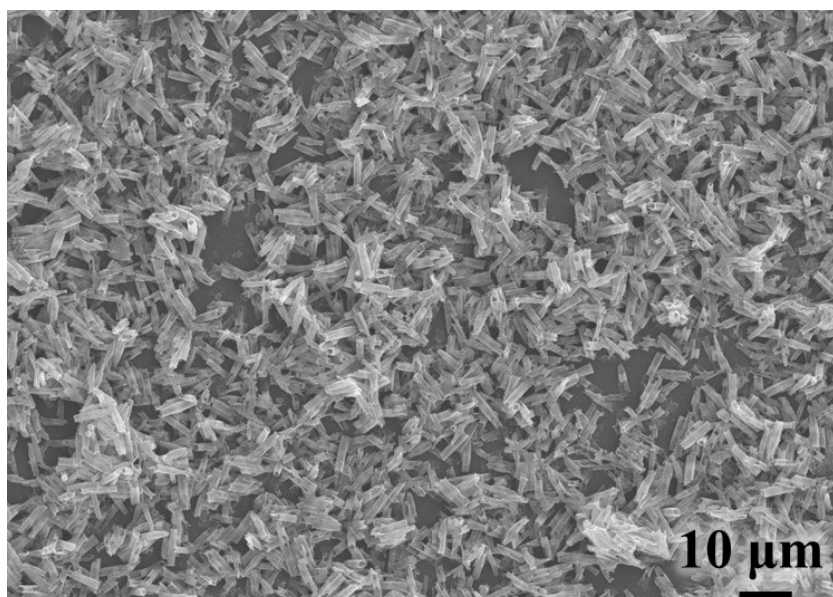

**Fig. S19.** SEM image of Cu-In<sub>2</sub>O<sub>3</sub>/C after photocatalytic CO<sub>2</sub> reduction

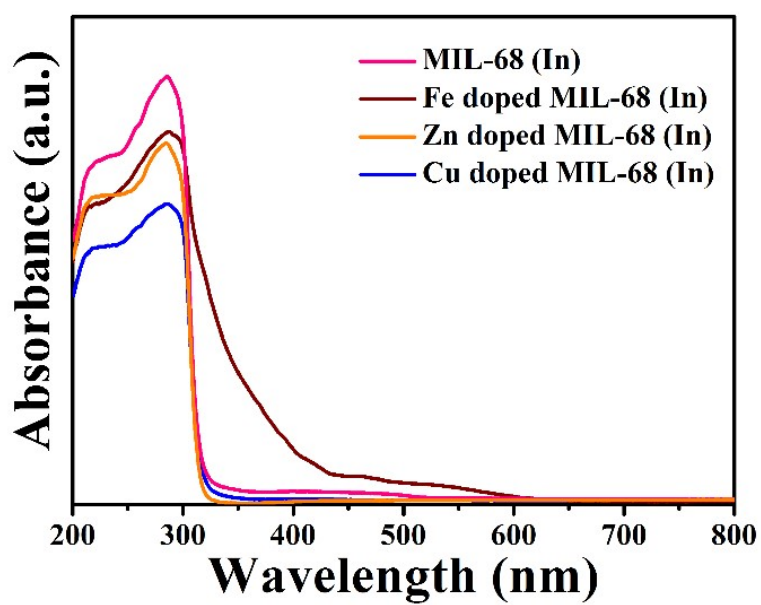

**Fig. S20.** UV-Vis diffuse reflectance spectra of MIL-68 (In), Zn- MIL-68 (In), Cu- MIL-68 (In), and Fe- MIL-68 (In), respectively.



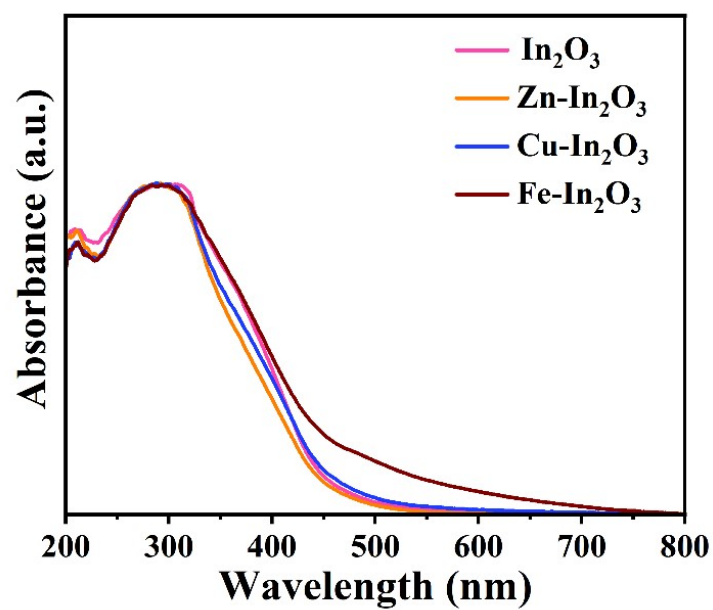

**Fig. S21.** UV-Vis diffuse reflectance spectra of  $\text{In}_2\text{O}_3$ ,  $\text{Zn-In}_2\text{O}_3$ ,  $\text{Cu-In}_2\text{O}_3$ , and  $\text{Fe-In}_2\text{O}_3$ , respectively.

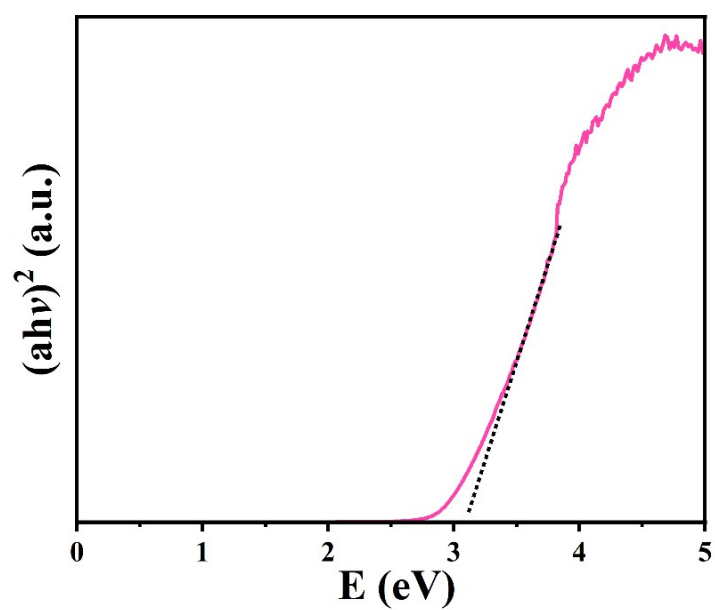

**Fig. S22.** Tauc plot of the  $\text{In}_2\text{O}_3$ .

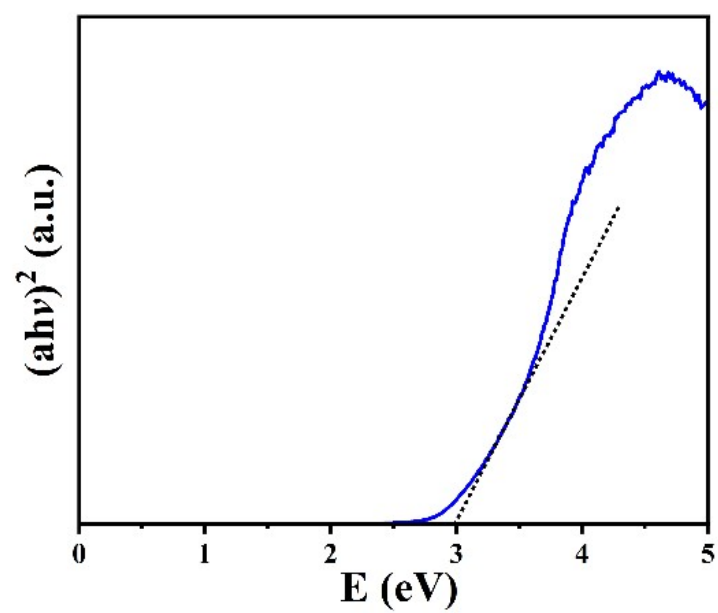

**Fig. S23.** Tauc plot of the Cu-In<sub>2</sub>O<sub>3</sub>.

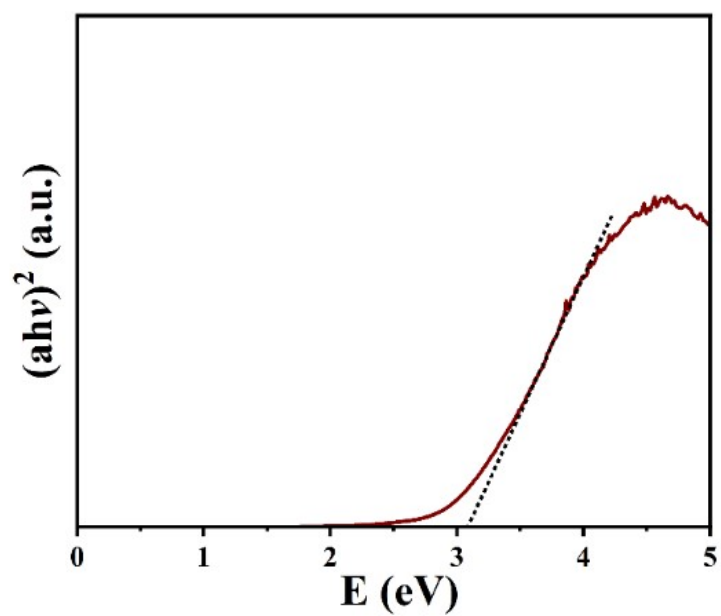

**Fig. S24.** Tauc plot of the Fe-In<sub>2</sub>O<sub>3</sub>.

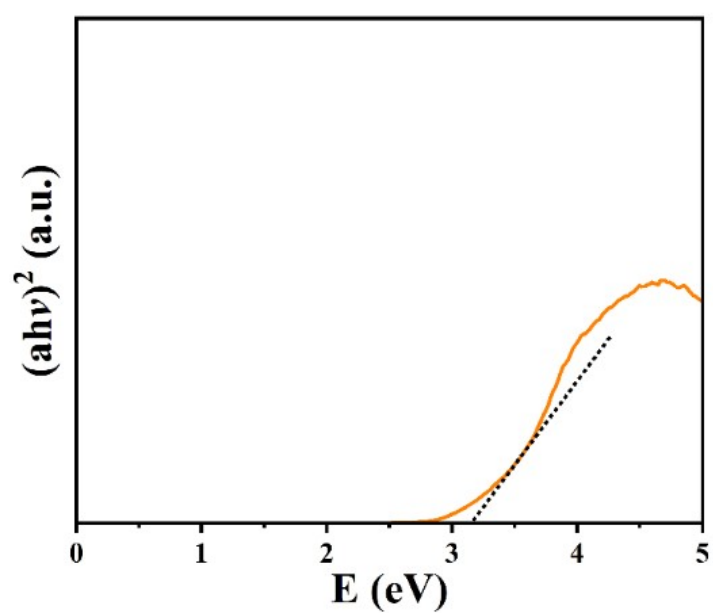

Fig. S25. Tauc plot of the Zn-In<sub>2</sub>O<sub>3</sub>.

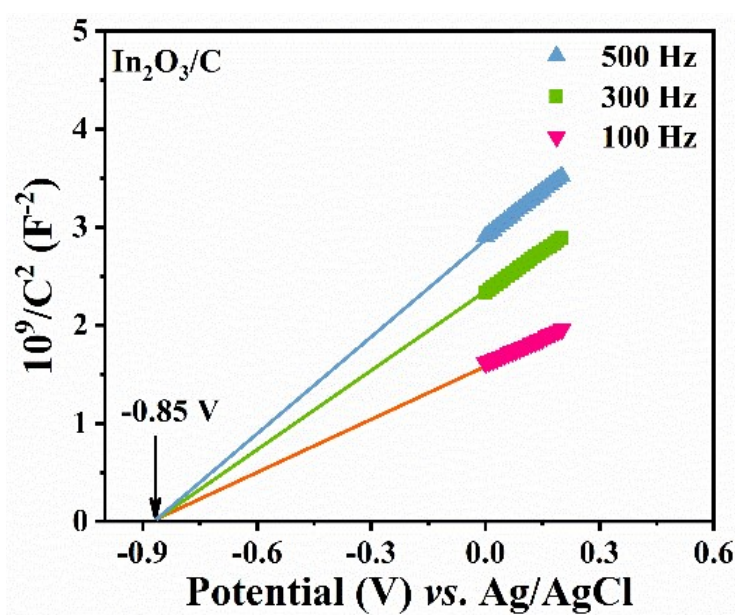

Fig. S26. Mott-Schottky plots of In<sub>2</sub>O<sub>3</sub>/C.

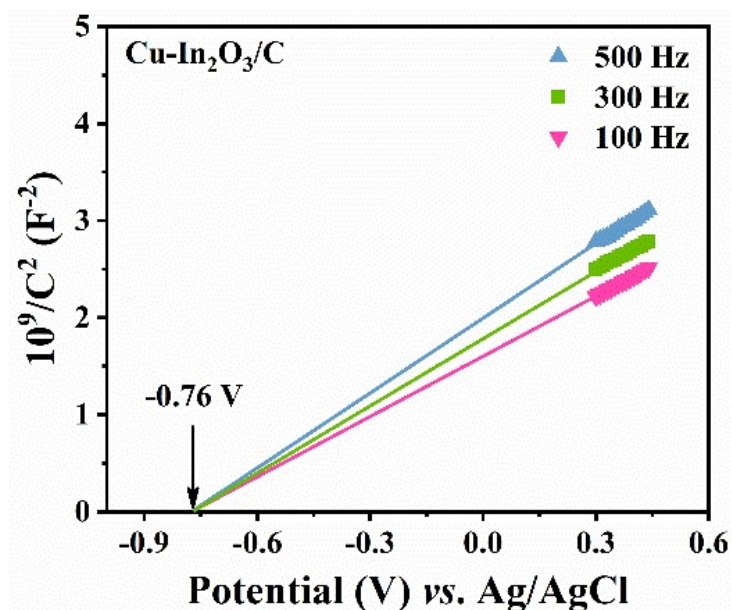

Fig. S27. Mott-Schottky plots of Cu-In<sub>2</sub>O<sub>3</sub>/C.

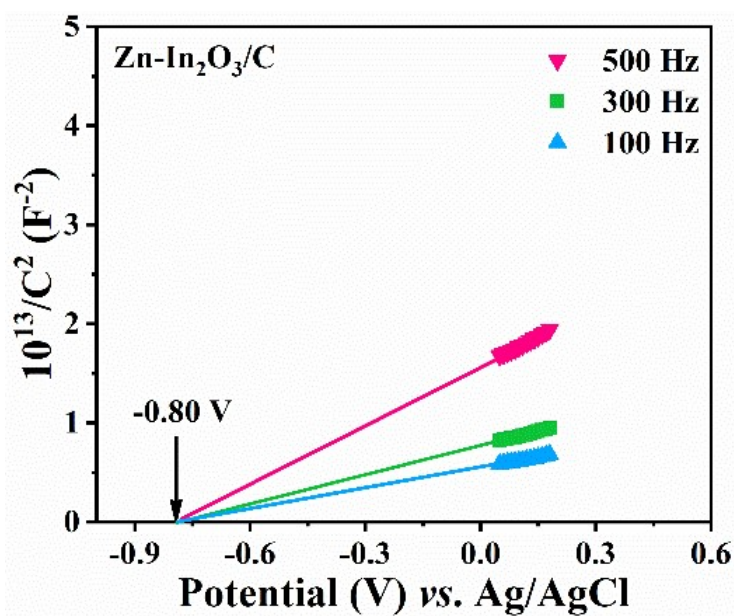

Fig. S28. Mott-Schottky plots of Zn-In<sub>2</sub>O<sub>3</sub>/C.

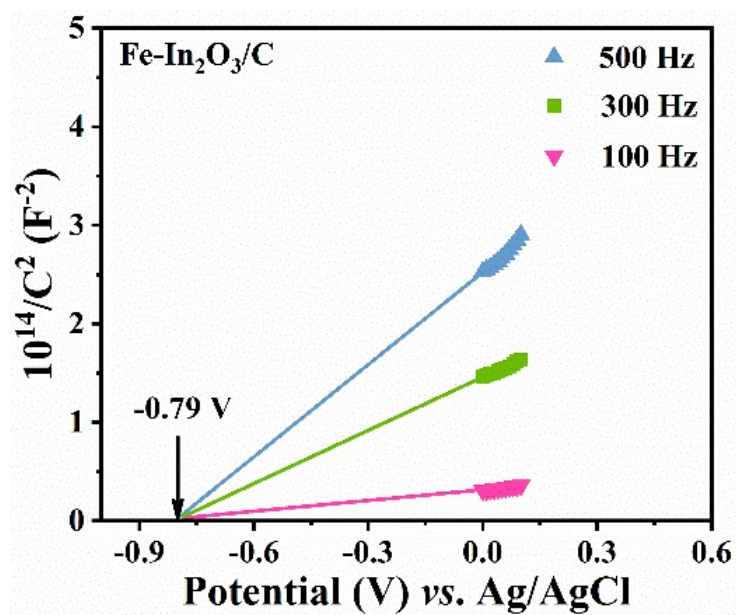

Fig. S29. Mott-Schottky plots of Fe-In<sub>2</sub>O<sub>3</sub>/C.

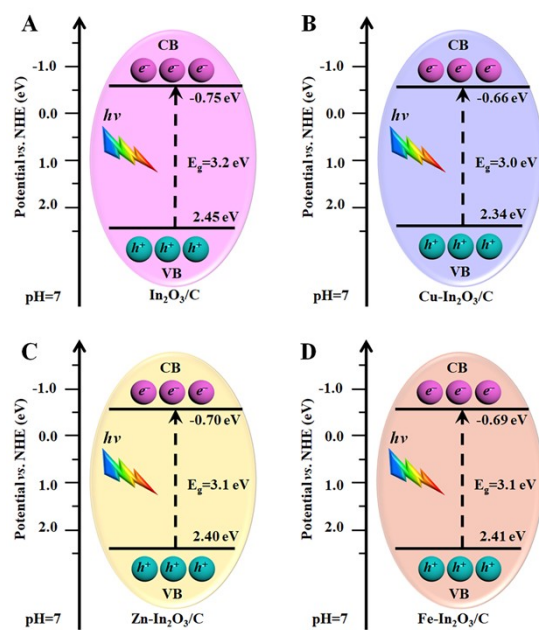

Fig. S30. Schematic illustration of band structure for In<sub>2</sub>O<sub>3</sub>/C, Cu-In<sub>2</sub>O<sub>3</sub>/C, Zn-In<sub>2</sub>O<sub>3</sub>/C, and Fe-In<sub>2</sub>O<sub>3</sub>/C.

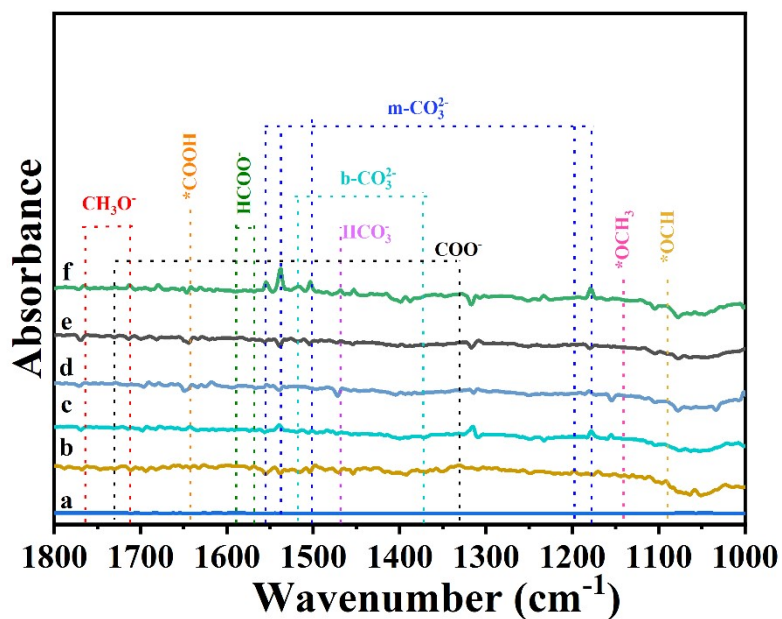

**Fig. S31.** In-situ DRIFT spectra of  $\text{In}_2\text{O}_3/\text{C}$  (a) in darkness, and under visible light irradiation for (b) 5, (c) 10, (d) 15, (e) 20 and (f) 25 min in photocatalytic  $\text{CO}_2$  reduction process.

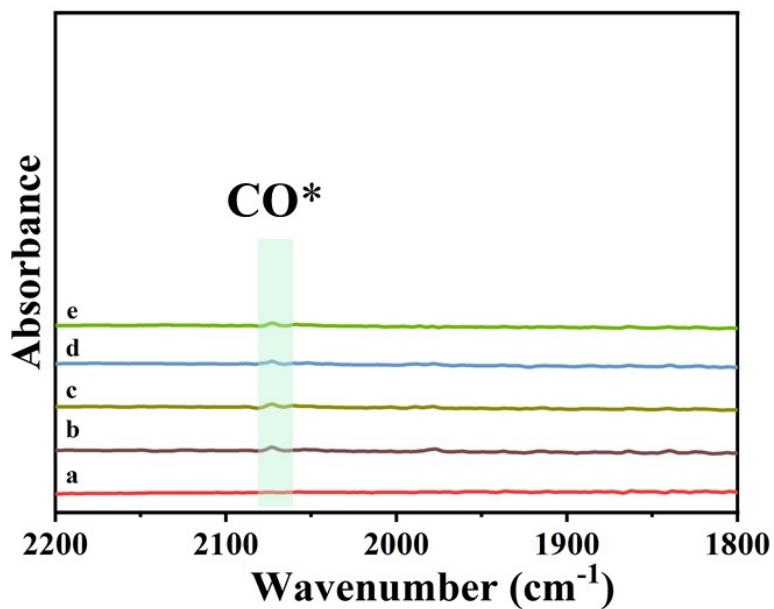

**Fig. S32.** In-situ DRIFT spectra of  $\text{Cu-In}_2\text{O}_3/\text{C}$  (a) in darkness, and under visible light irradiation for (b) 5, (c) 10, (d) 15, (e) 20 and (f) 25 min in photocatalytic  $\text{CO}_2$  reduction process.

**Table S1.** Comparison of previously reported MOF derivatives-based photocatalysts for CO<sub>2</sub> reduction.

| Photocatalyst                                                      | Illumination range |    | Photosensitizer                                          | Reaction condition         | Product            | Production rate (μmol g <sup>-1</sup> h <sup>-1</sup> ) | Selectivity (%) | Ref.      |
|--------------------------------------------------------------------|--------------------|----|----------------------------------------------------------|----------------------------|--------------------|---------------------------------------------------------|-----------------|-----------|
| In <sub>2</sub> O <sub>3</sub> /In <sub>2</sub> S <sub>3</sub>     | >420 nm            |    | /                                                        | /                          | CH <sub>4</sub>    | 14.3                                                    | 84.7            | 8         |
| C-In <sub>2</sub> O <sub>3</sub> @ZnCo <sub>2</sub> O <sub>4</sub> | >320 nm            |    | /                                                        | TEA                        | CO                 | 44.1                                                    | 66              | 9         |
| MnS/In <sub>2</sub> S <sub>3</sub>                                 | Xe lamp            |    | /                                                        | TEOA、MeCN                  | CO                 | 58                                                      | /               | 10        |
| ZnO@Co <sub>3</sub> O <sub>4</sub>                                 | Xe lamp            |    | /                                                        | H <sub>2</sub> O           | CO                 | 6.51                                                    | 86.8            | 11        |
| In <sub>2</sub> O <sub>3</sub> -CeO <sub>2</sub>                   | Xe lamp            |    | /                                                        | /                          | CO                 | 42.2                                                    | 77.8            | 12        |
| Co <sub>3</sub> O <sub>4</sub> @CoFe <sub>2</sub> O <sub>4</sub>   | Xe lamp            |    | [Ru(bpy) <sub>3</sub> ]Cl <sub>2</sub> 6H <sub>2</sub> O | TEOA、H <sub>2</sub> O、MeCN | CO                 | 72.2                                                    | /               | 13        |
| NiCo <sub>2</sub> O <sub>4</sub> HCs                               | 400–800 nm         |    | [Ru(bpy) <sub>3</sub> ]Cl <sub>2</sub> 6H <sub>2</sub> O | TEOA、H <sub>2</sub> O、MeCN | CO                 | 10.5                                                    | 93.4            | 14        |
| Co <sub>3</sub> O <sub>4</sub> -NS                                 | 400–1000 nm        |    | [Ru(bpy) <sub>3</sub> ]Cl <sub>2</sub> 6H <sub>2</sub> O | TEOA、H <sub>2</sub> O、MeCN | CO                 | 4.52                                                    | 70.1            | 15        |
| ZnMn <sub>2</sub> O <sub>4</sub>                                   | Xe lamp            |    | /                                                        | /                          | CO                 | 23.99                                                   | /               | 16        |
| CuO <sub>x</sub> @p-ZnO                                            | /                  |    | /                                                        | TEA                        | CO                 | 27.3                                                    | /               | 17        |
| ZnO/NiO                                                            | Xe lamp            |    | /                                                        | H <sub>2</sub> O           | CH <sub>3</sub> OH | 1.57                                                    | /               | 18        |
| 1.0Pt/In <sub>2</sub> O <sub>3</sub>                               | 500 W lamp         | Hg | CH <sub>4</sub>                                          | H <sub>2</sub> O           | CH <sub>4</sub>    | 3.54                                                    | /               | 19        |
| Cu-In <sub>2</sub> O <sub>3</sub> /C                               | 300W lamp          | Xe | /                                                        | H <sub>2</sub> O<br>TEA    | CO                 | 43.7                                                    | 78              | This work |

## 4. References

1. S. Wang, B. Y. Guan, X. W. D. Lou, *J. Am. Chem. Soc.*, 2018, **140**, 5037.
2. R. Li, L. Sun, W. Zhan, Y.-A. Li, X. Wang, X. Han, *J. Mater. Chem. A*, 2018, **6**, 15747.
3. Q. Liang, X. Yan, Z. Li, Z. Wu, H. Shi, H. Huang and Z. Kang, *J. Mater. Chem. A*, 2022, **10**, 4279.
4. R. Das, K. Das, B. Ray, C. P. Vinod and S. C. Peter, *Energy Environ. Sci.*, 2022, **15**, 1967.
5. K. E. deKrafft, C. Wang, W. Lin, *Adv. Mater.*, 2012, **24**, 2014.
6. C. Zhao, A. Zhou, Y. Dou, J. Zhou, J. Bai, J.-R. Li, *Chem. Eng. J.*, 2021, **416**, 129155.
7. Y. Dou, S.-M. Xu, A. Zhou, H. Wang, J. Zhou, H. Yan, J.-R. Li, *Green Chem. Eng.*, 2020, **1**, 48.
8. D. Yan, Z. Wan, K. Wang, X. Wang, *Chem. Select*, 2021, **6**, 2508.
9. C. Zhao, A. Zhou, Y. Dou, J. Zhou, J. Bai, J.-R. Li, *Chem. Eng. J.* 2021, **416**, 129155.
10. J. Tan, M. Yu, Z. Cai, X. Lou, J. Wang, Z. Li, *J. Colloid. Interface Sci.*, 2021, **588**, 547.
11. T. Wang, L. Shi, J. Tang, V. Malgras, S. Asahina, G. Liu, H. Zhang, X. Meng, K. Chang, J. He, O. Terasaki, Y. Yamauchi, J. Ye, *Nanoscale*, 2016, **8**, 6712.
12. Q. Wang, Y. Chen, X. Liu, L. Li, L. Du, G. Tian, *Chem. Eng. J.*, 2021, **421**, 129968.
13. D. Long, X. Li, Z. Yin, S. Fan, P. Wang, *J. Alloy. Compound.*, 2021, **854**, 156942.
14. B. Han, J. Song, S. Liang, W. Chen, H. Deng, X. Ou, Y. -J. Xu, Z. Lin, *Appl. Catal. B Environ.*, 2020, **260**, 118208.
15. W. Chen, B. Han, C. Tian, X. Liu, S. Liang, H. Deng, Z. Lin, *Appl. Catal. B Environ.*, 2019, **244**, 996.
16. S. Yan, Y. Yu, Y. Cao, *Appl. Surf. Sci.*, 2019, **465**, 383.
17. W. Wang, C. Deng, S. Xie, Y. Li, W. Zhang, H. Sheng, C. Chen, J. Zhao, *J. Am. Chem. Soc.*, 2021, **143**, 2984.
18. S. Chen, J. Yu, J. Zhang, *J. CO<sub>2</sub> Util.*, 2018, **24**, 548.
19. Y.-X. Pan, Y. You, S. Xin, Y. Li, G. Fu, Z. Cui, Y.-L. Men, F.-F. Cao, S.-H. Yu, J. B. Goodenough, *J. Am. Chem. Soc.* 2017, **139**, 4123.
